# Supplementary material for: Modeling rapid and selective capture of nNOS–PSD-95 uncouplers from Sanhuang Xiexin decoction by novel molecularly imprinted polymers based on metal–organic frameworks
Source: Royal Society of Chemistry journal article supplement (doi:10.1039/c9ra10537a), 2020-01-01
Supplement: c9ra10537a1.pdf [file c9ra10537a1.pdf]

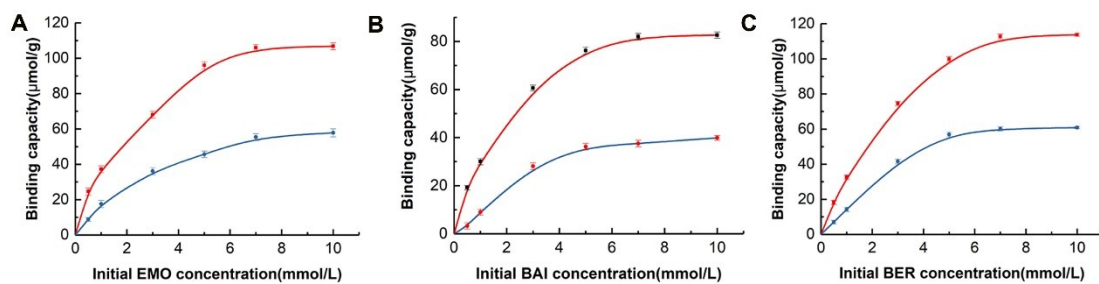

16

17 **Fig. S1** Static adsorption curve of (A) EMO@MIPs, (B) BAI@MIPs, (C)  
18 BER@MIPs.

19

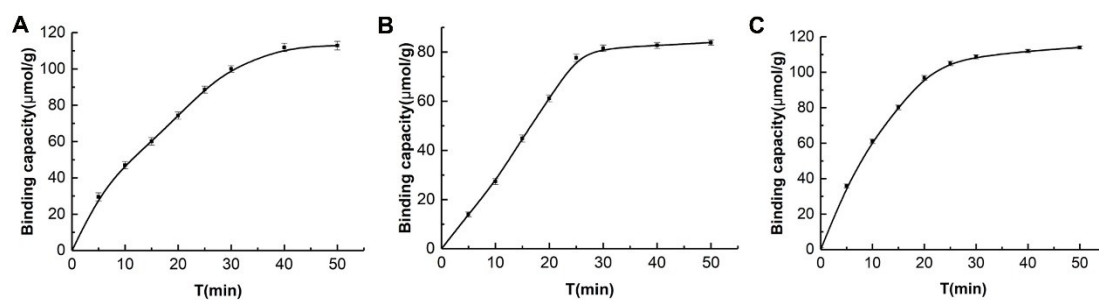

20

21 **Fig. S2** Kinetic adsorption curve of (A) EMO@MIPs, (B) BAI@MIPs, (C)  
22 BER@MIPs.

23

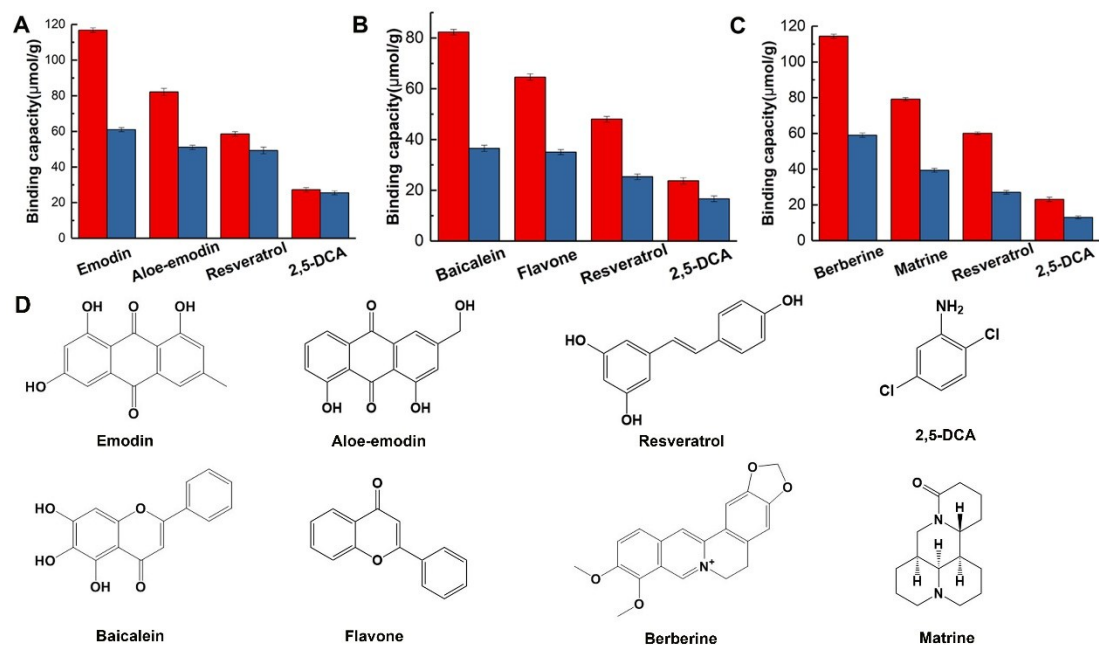

24

25 **Fig. S3** Selective adsorption ability of (A) EMO@MIPs, (B) BAI@MIPs, (C)  
26 BER@MIPs, (D) the structure of the compounds detected.

27

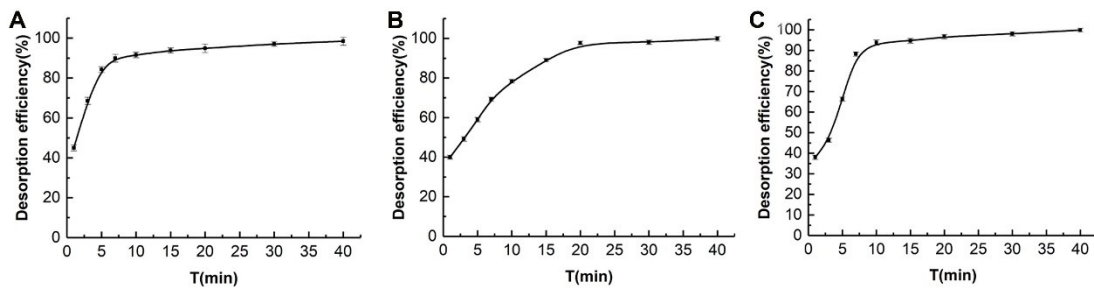

28

29 **Fig. S4** Desorption efficiency of (A) EMO@MIPs, (B) BAI@MIPs, (C) BER@MIPs.

30

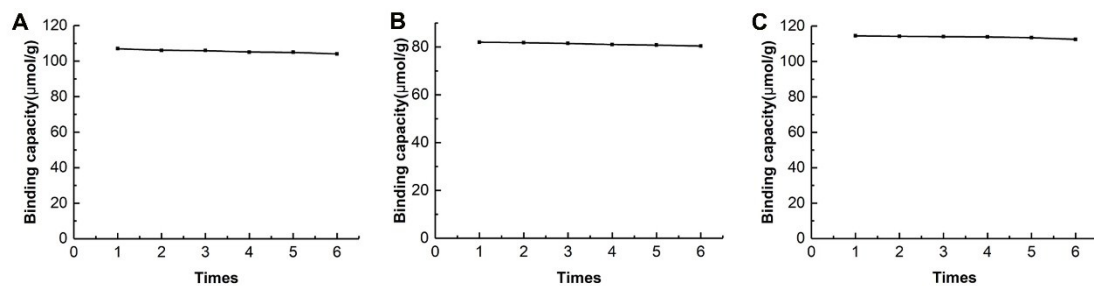

31

32 **Fig. S5** Reusability of (A) EMO@MIPs, (B) BAI@MIPs, (C) BER@MIPs.

33

34 **Table S1**

35 The chromatographic condition of Sanhuang Xiexin Decoction

| Sanhuang Xiexin Decoction |                           |        |
|---------------------------|---------------------------|--------|
| Mobile phase              | A: 1% formic acid; B: ACN |        |
| Gradient                  | 0-7 min                   | 2% B   |
|                           | 10 min                    | 20% B  |
|                           | 30-40 min                 | 25% B  |
|                           | 45 min                    | 50% B  |
|                           | 55 min                    | 60% B  |
|                           | 70 min                    | 75% B  |
|                           | 85 min                    | 100% B |
| Detection                 | 280nm                     |        |

36

37

38

39

40

41

42

43

44

45

46

47

48

49

50

51

52 **Table S2**

53 The adsorption capacity of different EMO@MIPs under different conditions

| Polymer    | Emodin (mmol) | Solvent                                   | Functional Monomer | Molar ratio <sup>a</sup> | Q <sub>EMO@MIPs</sub> (μmol/g) | IF <sup>b</sup> |
|------------|---------------|-------------------------------------------|--------------------|--------------------------|--------------------------------|-----------------|
| EMO@MIPs-1 | 0.4           | Acetonitrile/ethanol (1:2,v/v)            | MAA                | 1:6:30                   | 19.08                          | 1.04            |
| EMO@MIPs-2 | 0.5           | Acetonitrile/ethanol (1:2,v/v)            | MAA                | 1:6:30                   | 108.54                         | 1.95            |
| EMO@MIPs-3 | 0.6           | Acetonitrile/ethanol (1:2,v/v)            | MAA                | 1:6:30                   | 50.01                          | 1.29            |
| EMO@MIPs-4 | 0.5           | Tetrahydrofuran/ethanol<br>1<br>(1:2,v/v) | MAA                | 1:6:30                   | 58.40                          | 1.52            |
| EMO@MIPs-5 | 0.5           | Acetonitrile/ethanol (2:1,v/v)            | MAA                | 1:6:30                   | 100.50                         | 1.94            |
| EMO@MIPs-6 | 0.5           | Acetonitrile/ethanol (1:2,v/v)            | MMA                | 1:6:30                   | 79.74                          | 1.08            |
| EMO@MIPs-7 | 0.5           | Acetonitrile/ethanol (1:2,v/v)            | 4-VP               | 1:6:30                   | 76.61                          | 1.20            |
| EMO@MIPs-8 | 0.5           | Acetonitrile/ethanol (1:2,v/v)            | MAA                | 1:5:25                   | 100.70                         | 1.36            |
| EMO@MIPs-9 | 0.5           | Acetonitrile/ethanol (1:2,v/v)            | MAA                | 1:7:35                   | 57.22                          | 1.44            |

54 <sup>a</sup> Molar ratio refers to the ratio of template, functional monomer and cross-linker.55 <sup>b</sup> IF represents the value of  $Q_{EMO@MIPs}/Q_{EMO@NIPs}$ , where  $Q_{EMO@MIPs}$  and  $Q_{EMO@NIPs}$  refer to the binding  
56 capacity of EMO@MIPs and EMO@NIPs, respectively.

57

58

59

60

61

62

63

64

65

66

67 **Table S3**

68 The adsorption capacity of different BAI@MIPs under different conditions

| Polymer    | Baicalein (mmol) | Solvent                        | Functional Monomer | Molar ratio <sup>a</sup> | Q <sub>BAI@MIPs</sub> (μmol/g) | IF <sup>b</sup> |
|------------|------------------|--------------------------------|--------------------|--------------------------|--------------------------------|-----------------|
| BAI@MIPs-1 | 0.4              | Acetonitrile/ethanol (1:2,v/v) | MAA                | 1:6:30                   | 58.66                          | 1.08            |
| BAI@MIPs-2 | 0.5              | Acetonitrile/ethanol (1:2,v/v) | MAA                | 1:6:30                   | 81.52                          | 2.06            |
| BAI@MIPs-3 | 0.6              | Acetonitrile/ethanol (1:2,v/v) | MAA                | 1:6:30                   | 49.46                          | 1.01            |
| BAI@MIPs-4 | 0.5              | Tetrahydrofuran/ethanol        | MAA                | 1:6:30                   | 57.65                          | 1.44            |
| BAI@MIPs-5 | 0.5              | Acetonitrile/ethanol (2:1,v/v) | MAA                | 1:6:30                   | 76.54                          | 1.60            |
| BAI@MIPs-6 | 0.5              | Acetonitrile/ethanol (1:2,v/v) | MMA                | 1:6:30                   | 68.27                          | 1.32            |
| BAI@MIPs-7 | 0.5              | Acetonitrile/ethanol (1:2,v/v) | 4-VP               | 1:6:30                   | 79.65                          | 1.28            |
| BAI@MIPs-8 | 0.5              | Acetonitrile/ethanol (1:2,v/v) | MAA                | 1:5:25                   | 73.31                          | 2.31            |
| BAI@MIPs-9 | 0.5              | Acetonitrile/ethanol (1:2,v/v) | MAA                | 1:7:35                   | 77.38                          | 2.34            |

69 <sup>a</sup> Molar ratio refers to the ratio of template, functional monomer and cross-linker.70 <sup>b</sup> IF represents the value of Q<sub>BAI@MIPs</sub>/Q<sub>BAI@NIPs</sub>, where Q<sub>BAI@MIPs</sub> and Q<sub>BAI@NIPs</sub> refer to the binding capacity of BAI@MIPs and BAI@NIPs, respectively.

72

73

74

75

76

77

78

79

80

81

82 **Table S4**

83 The adsorption capacity of different BER@MIPs under different conditions

| Polymer    | Berberine (mmol) | Solvent                        | Functional Monomer | Molar ratio <sup>a</sup> | Q <sub>BER@MIPs</sub> (μmol/g) | IF <sup>b</sup> |
|------------|------------------|--------------------------------|--------------------|--------------------------|--------------------------------|-----------------|
| BER@MIPs-1 | 0.4              | Acetonitrile/ethanol (1:2,v/v) | MAA                | 1:6:30                   | 86.05                          | 1.81            |
| BER@MIPs-2 | 0.5              | Acetonitrile/ethanol (1:2,v/v) | MAA                | 1:6:30                   | 114.46                         | 1.96            |
| BER@MIPs-3 | 0.6              | Acetonitrile/ethanol (1:2,v/v) | MAA                | 1:6:30                   | 63.40                          | 1.38            |
| BER@MIPs-4 | 0.5              | Tetrahydrofuran/ethanol        | MAA                | 1:6:30                   | 82.46                          | 1.02            |
| BER@MIPs-5 | 0.5              | Acetonitrile/ethanol (2:1,v/v) | MAA                | 1:6:30                   | 88.72                          | 1.67            |
| BER@MIPs-6 | 0.5              | Acetonitrile/ethanol (1:2,v/v) | MMA                | 1:6:30                   | 104.76                         | 1.70            |
| BER@MIPs-7 | 0.5              | Acetonitrile/ethanol (1:2,v/v) | 4-VP               | 1:6:30                   | 87.17                          | 1.25            |
| BER@MIPs-8 | 0.5              | Acetonitrile/ethanol (1:2,v/v) | MAA                | 1:5:25                   | 100.49                         | 1.23            |
| BER@MIPs-9 | 0.5              | Acetonitrile/ethanol (1:2,v/v) | MAA                | 1:7:35                   | 100.32                         | 1.08            |

84 <sup>a</sup> Molar ratio refers to the ratio of template, functional monomer and cross-linker.85 <sup>b</sup> IF represents the value of Q<sub>BER@MIPs</sub>/Q<sub>BER@NIPs</sub>, where Q<sub>BER@MIPs</sub> and Q<sub>BER@NIPs</sub> refer to the binding  
86 capacity of BER@MIPs and BER@NIPs, respectively.

87

88

89

90

91

92

93

94

95

96

97

98 **Table S5**

99 The mass characteristics of the compounds

| Peak | Name                     | Formula                                         | Retention time (min) | [M+H] <sup>+</sup> | Reference |
|------|--------------------------|-------------------------------------------------|----------------------|--------------------|-----------|
| 1    | Coptisine                | C <sub>19</sub> H <sub>14</sub> NO <sub>4</sub> | 27.4                 | 321                | [1]       |
| 2    | Baicalin                 | C <sub>21</sub> H <sub>18</sub> O <sub>11</sub> | 30.3                 | 447                | [1]       |
| 3    | Berberine                | C <sub>20</sub> H <sub>18</sub> NO <sub>4</sub> | 35.3                 | 337                | [1]       |
| 4    | Emodin-8-O-β-D-glucoside | C <sub>21</sub> H <sub>20</sub> O <sub>10</sub> | 38.4                 | 433                | [2]       |
| 5    | Wogonoside               | C <sub>22</sub> H <sub>20</sub> O <sub>11</sub> | 42.0                 | 461                | [1]       |
| 6    | Baicalein                | C <sub>15</sub> H <sub>10</sub> O <sub>5</sub>  | 49.1                 | 271                | [1]       |
| 7    | Emodin                   | C <sub>15</sub> H <sub>10</sub> O <sub>5</sub>  | 56.6                 | 269                | [1]       |
| 8    | Chrysophanol             | C <sub>15</sub> H <sub>10</sub> O <sub>4</sub>  | 61.2                 | 255                | [2]       |
| 9    | Physcion                 | C <sub>16</sub> H <sub>12</sub> O <sub>5</sub>  | 64.7                 | 285                | [2]       |

100

101 **Table S6**102 EC<sub>50</sub> values of the compounds on glutamate-injured PC12 cells

| Substance         | EC <sub>50</sub> value (μM) |
|-------------------|-----------------------------|
| ZL006             | 26.674±2.886                |
| Emodin            | 76.205±3.668                |
| Baicalein         | 25.879±3.076                |
| Berberine         | 11.940±3.038                |
| SXD extracts      | 15.470±3.853                |
| Active components | 20.548±3.155                |

103

104



105 **References**

- 106 [1] Q. Zhang, C. H. Wang, Y. M. Ma, E. Y. Zhu and Z. T. Wang, *Biomed.*  
107 *Chromatogr.*, 2013, **27**, 1079-1088.
- 108 [2] T. Y. Wu, F. R. Chang, J. R. Liou, I. W. Lo, T. C. Chung, L. Y. Lee, C. C. Chi, Y.  
109 C. Du, M. H. Wong, S. H. H Juo, C. C. Lee and Y. C. Wu, *Front. Pharmacol.*, 2016,  
110 **7**, 374.
